# Supplementary material for: An intermolecular quadruple hydrogen-bonding strategy to fabricate self-healing and highly deformable polyurethane hydrogels
Source: Royal Society of Chemistry journal article supplement (doi:10.1039/c4tb00862f), 2014-08-19
Supplement: c4tb00862f1.pdf [file c4tb00862f1.pdf]

## Supporting Information

# Intermolecular quadruple hydrogen-bonding strategy to fabricate self-healing and highly deformable polyurethane hydrogels

Yinlei Lin, Guangji Li\*

*School of Materials Science and Engineering, South China University of Technology,  
Guangzhou 510640, China*

*Corresponding author: Guangji Li*

*Fax: +86 20 87113949*

*E-mail addresses: [gjli@scut.edu.cn](mailto:gjli@scut.edu.cn) (G. Li).*

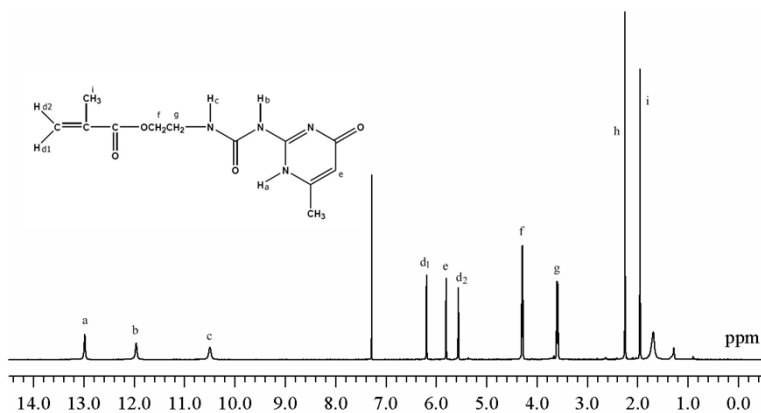

**Figure S1**  $^1\text{H}$  NMR spectrum of SCMHBMA in  $\text{CDCl}_3$

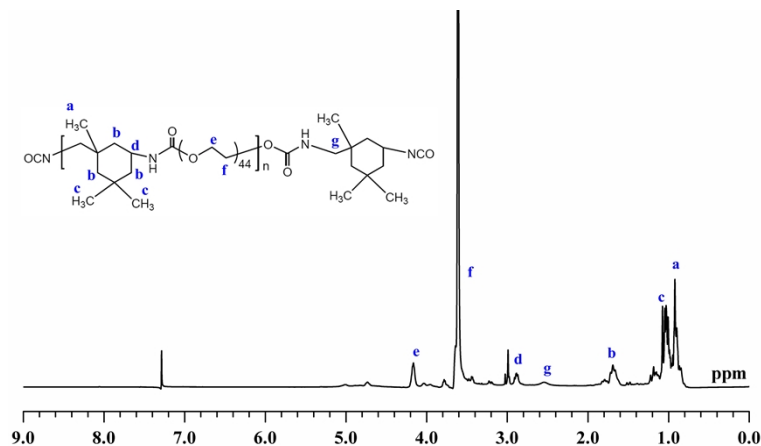

**Figure S2**  $^1\text{H}$  NMR spectrum of PU-NCO in  $\text{CDCl}_3$ .

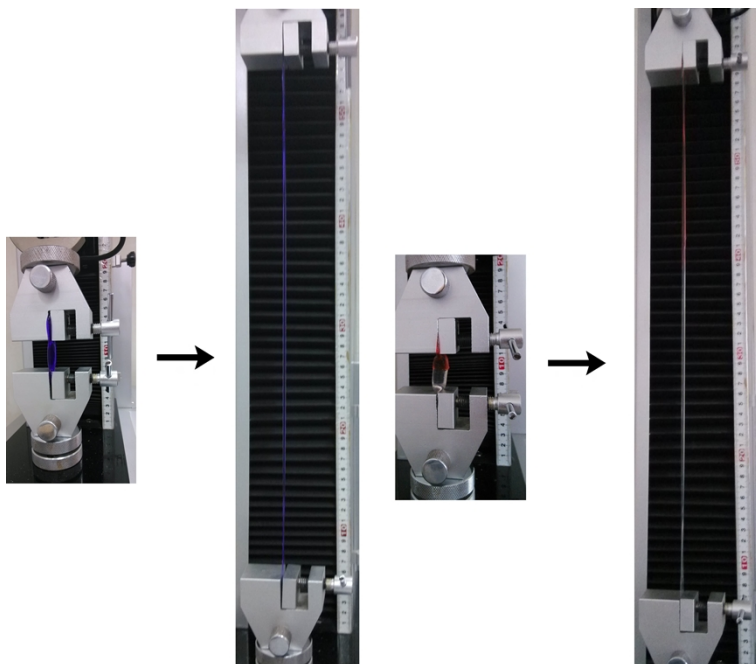

**Figure S3** Tension tests of original (left) and self-healed (right) polyurethane hydrogels.
